# Supplementary material for: B-Vitamin Intake from Diet and Supplements and Breast Cancer Risk in Middle-Aged Women: Results from the Prospective NutriNet-Santé Cohort
Source: MDPI journal article supplement (doi:10.3390/nu9050488), 2017-05-13
Supplement: s1 [file s1]

**Supplemental Table 1.** Associations between dietary, supplemental, and total B vitamin intake and breast cancer risk, from age-adjusted Cox proportional hazards models<sup>a</sup>, NutriNet-Santé Cohort, France, 2009-2016.

|                  |                 | Dietary intake   |      |             |         | Supplemental intake |            |       |             |                  | Total intake |            |         |             |      |
|------------------|-----------------|------------------|------|-------------|---------|---------------------|------------|-------|-------------|------------------|--------------|------------|---------|-------------|------|
|                  |                 | Cases /non cases | HR   | 95%CI       | P-trend | Cases /non cases    | HR         | 95%CI | P-trend     | Cases /non cases | HR           | 95%CI      | P-trend |             |      |
| Thiamin          | Continuous      | 462/27,376       | 0.90 | [0.70–1.15] | 0.4     | Users vs non-users  | 56/3350    | 0.93  | [0.71–1.23] | 0.6              | Continuous   | 462/27,376 | 0.83    | [0.67–1.03] | 0.09 |
| Vitamin B1       | Q1 <sup>b</sup> | 121/6820         | 1    | (ref)       | 0.3     | C1                  | 406/24,026 | 1     | (ref)       | 0.2              | Q1           | 120/6817   | 1       | (ref)       | 0.2  |
|                  | Q2              | 113/6857         | 0.88 | [0.68–1.14] |         | C2                  | 26/1125    | 1.32  | [0.89–1.97] |                  | Q2           | 110/6853   | 0.87    | [0.67–1.12] |      |
|                  | Q3              | 125/6848         | 0.97 | [0.76–1.25] |         | C3                  | 18/1099    | 0.89  | [0.56–1.43] |                  | Q3           | 134/6844   | 1.05    | [0.82–1.34] |      |
|                  | Q4              | 103/6851         | 0.83 | [0.64–1.08] |         | C4                  | 12/1126    | 0.59  | [0.33–1.05] |                  | Q4           | 98/6862    | 0.79    | [0.60–1.03] |      |
| Riboflavin       | Continuous      | 462/27,383       | 1.04 | [0.87–1.25] | 0.6     | Users vs non-users  | 56/3385    | 0.93  | [0.70–1.22] | 0.6              | Continuous   | 462/27,383 | 0.96    | [0.83–1.10] | 0.5  |
| Vitamin B2       | Q1              | 106/6831         | 1    | (ref)       | 0.6     | C1                  | 406/23,998 | 1     | (ref)       | 0.3              | Q1           | 104/6832   | 1       | (ref)       | 0.8  |
|                  | Q2              | 120/6857         | 1.07 | [0.83–1.39] |         | C2                  | 22/1124    | 1.10  | [0.71–1.68] |                  | Q2           | 122/6853   | 1.11    | [0.85–1.44] |      |
|                  | Q3              | 111/6857         | 0.97 | [0.74–1.26] |         | C3                  | 22/1133    | 1.07  | [0.70–1.65] |                  | Q3           | 117/6849   | 1.04    | [0.80–1.35] |      |
|                  | Q4              | 125/6838         | 1.11 | [0.85–1.43] |         | C4                  | 12/1128    | 0.60  | [0.34–1.07] |                  | Q4           | 119/6849   | 1.06    | [0.82–1.38] |      |
| Niacin           | Continuous      | 462/27,382       | 1.00 | [0.99–1.02] | 0.9     | Users vs non-users  | 52/3336    | 0.86  | [0.65–1.15] | 0.3              | Continuous   | 462/27,382 | 1.00    | [0.98–1.01] | 0.7  |
| Vitamin B3       | Q1              | 101/6841         | 1    | (ref)       | 0.6     | C1                  | 410/24,046 | 1     | (ref)       | 0.2              | Q1           | 102/6835   | 1       | (ref)       | 0.9  |
|                  | Q2              | 120/6849         | 1.10 | [0.85–1.44] |         | C2                  | 18/1132    | 0.89  | [0.56–1.43] |                  | Q2           | 122/6848   | 1.11    | [0.85–1.44] |      |
|                  | Q3              | 123/6846         | 1.12 | [0.86–1.45] |         | C3                  | 22/1137    | 1.06  | [0.69–1.63] |                  | Q3           | 125/6846   | 1.11    | [0.86–1.45] |      |
|                  | Q4              | 118/6846         | 1.09 | [0.83–1.42] |         | C4                  | 12/1067    | 0.62  | [0.35–1.10] |                  | Q4           | 113/6853   | 1.02    | [0.78–1.34] |      |
| Pantothenic acid | Continuous      | 462/27,370       | 1.00 | [0.94–1.07] | 0.7     | Users vs non-users  | 46/3093    | 0.83  | [0.61–1.12] | 0.2              | Continuous   | 462/27,370 | 0.97    | [0.92–1.02] | 0.3  |
| Vitamin B5       | Q1              | 109/6827         | 1    | (ref)       | 0.9     | C1                  | 416/24,277 | 1     | (ref)       | 0.1              | Q1           | 111/6820   | 1       | (ref)       | 0.7  |
|                  | Q2              | 122/6851         | 1.05 | [0.81–1.36] |         | C2                  | 14/1017    | 0.79  | [0.46–1.33] |                  | Q2           | 116/6856   | 0.99    | [0.76–1.29] |      |
|                  | Q3              | 109/6856         | 0.93 | [0.71–1.21] |         | C3                  | 22/976     | 1.25  | [0.81–1.91] |                  | Q3           | 125/6838   | 1.05    | [0.81–1.35] |      |
|                  | Q4              | 122/6836         | 1.06 | [0.82–1.38] |         | C4                  | 10/1100    | 0.50  | [0.27–0.93] |                  | Q4           | 110/6856   | 0.94    | [0.72–1.22] |      |
| Pyridoxine       | Continuous      | 462/27,323       | 0.90 | [0.74–1.09] | 0.1     | Users vs non-users  | 76/5021    | 0.83  | [0.65–1.07] | 0.1              | Continuous   | 462/27,323 | 0.85    | [0.75–0.96] | 0.01 |
| Vitamin B6       | Q1              | 115/6808         | 1    | (ref)       | 0.2     | C1                  | 386/22,302 | 1     | (ref)       | 0.05             | Q1           | 113/6808   | 1       | (ref)       | 0.08 |
|                  | Q2              | 123/6836         | 0.99 | [0.77–1.28] |         | C2                  | 33/1816    | 1.01  | [0.71–1.44] |                  | Q2           | 126/6827   | 1.02    | [0.79–1.32] |      |
|                  | Q3              | 122/6833         | 0.97 | [0.75–1.25] |         | C3                  | 25/1549    | 0.88  | [0.59–1.31] |                  | Q3           | 131/6822   | 1.06    | [0.82–1.36] |      |
|                  | Q4              | 102/6846         | 0.83 | [0.63–1.08] |         | C4                  | 18/1656    | 0.60  | [0.38–0.96] |                  | Q4           | 92/6866    | 0.75    | [0.57–0.99] |      |
| Folate           | Continuous      | 462/27,386       | 1.00 | [1.00–1.00] | 0.5     | Users vs non-users  | 56/3512    | 0.89  | [0.67–1.17] | 0.4              | Continuous   | 462/27,386 | 1.00    | [1.00–1.00] | 0.3  |
| Vitamin B9       | Q1              | 116/6810         | 1    | (ref)       | 0.9     | C1                  | 406/23,874 | 1     | (ref)       | 0.2              | Q1           | 117/6807   | 1       | (ref)       | 0.7  |
|                  | Q2              | 98/6879          | 0.77 | [0.59–1.01] |         | C2                  | 24/1035    | 1.31  | [0.87–1.98] |                  | Q2           | 100/6877   | 0.78    | [0.60–1.02] |      |

|             |            |            |      |             |     |                       |            |      |             |     |            |           |      |             |     |
|-------------|------------|------------|------|-------------|-----|-----------------------|------------|------|-------------|-----|------------|-----------|------|-------------|-----|
|             | Q3         | 128/6841   | 0.98 | [0.76–1.26] |     | C3                    | 17/1404    | 0.67 | [0.41–1.08] |     | Q3         | 127/6843  | 0.96 | [0.75–1.24] |     |
|             | Q4         | 120/6856   | 0.91 | [0.71–1.18] |     | C4                    | 15/1073    | 0.78 | [0.47–1.30] |     | Q4         | 118/6859  | 0.89 | [0.69–1.15] |     |
| Cobalamin   | Continuous | 462/27,378 | 1.01 | [0.99–1.03] | 0.3 | Users vs<br>non-users | 35/2191    | 0.91 | [0.65–1.29] | 0.6 | Continuous | 462/27378 | 1.00 | [0.99–1.01] | 0.8 |
| Vitamin B12 | Q1         | 97/6846    | 1    | (ref)       | 0.4 | C1                    | 427/25,187 | 1    | (ref)       | 0.4 | Q1         | 96/6845   | 1    | (ref)       | 0.4 |
|             | Q2         | 119/6851   | 1.14 | [0.87–1.49] |     | C2                    | 11/727     | 0.87 | [0.48–1.58] |     | Q2         | 122/6848  | 1.18 | [0.90–1.54] |     |
|             | Q3         | 123/6836   | 1.15 | [0.88–1.50] |     | C3                    | 17/729     | 1.28 | [0.79–2.07] |     | Q3         | 121/6838  | 1.14 | [0.87–1.49] |     |
|             | Q4         | 123/6845   | 1.15 | [0.88–1.49] |     | C4                    | 7/735      | 0.57 | [0.27–1.20] |     | Q4         | 123/6847  | 1.16 | [0.89–1.52] |     |

Q, quartile; C, class (C1 = non-users and C2 to C4 = tertiles of supplemental intake in users of the corresponding supplement) <sup>a</sup>Models were only age-adjusted (time-scale in Cox models).<sup>b</sup> Cut-offs for quartiles of dietary intakes were 0.9/1.1/1.4 mg/d for thiamin, 1.4/1.7/2.1 mg/d for riboflavin, 14.8/18.3/22.4 mg/d for niacin, 4.4/5.2/6.2 mg/d for pantothenic acid, 1.4/1.7/2.0 mg/d for pyridoxine, 262.6/324.2/397.8 µg/d for folate, and 3.2/4.3/6.1 µg/d for cobalamin. Cut-offs for tertiles of supplemental intakes in users of the corresponding supplement were 0.1/0.3 mg/d for thiamin, 0.1/0.3 mg/d for riboflavin, 0.7/3.0 mg/d for niacin, 0.5/1.5 mg/d for pantothenic acid, 0.2/0.7 mg/d for pyridoxine, 16.4/49.3 µg/d for folate, and 0.1/0.4 µg/d for cobalamin. Cut-offs for quartiles of total intakes were 0.9/1.1/1.4 mg/d for thiamin, 1.4/1.7/2.1 mg/d for riboflavin, 15.0/18.6/22.9 mg/d for niacin, 4.4/5.3/6.4 mg/d for pantothenic acid, 1.4/1.7/2.2 mg/d for pyridoxine, 265.8/328.8/405.2 µg/d for folate, and 3.2/4.4/6.2 µg/d for cobalamin.
